# Supplementary material
Source: publisher figshare collection journal article supplement (https://future-science-group.figshare.com/ndownloader/files/28220934)
Supplement: Supplementary file 1 [file 28220934]

**Appendices**

**Appendix 2: Study exclusion criteria.**

| **Exclusion criteria** |
| --- |
| Studies of benign hematologic disorders  Studies not in cancer/malignancy  Non-drug interventions (e.g., radiotherapy, surgical procedures, devices, behavioral/lifestyle/education)  Dietary, herbal, supplement, or traditional medicine/medicinal plant interventions  Drug–drug interaction studies  Drugs used for imaging or diagnosis  Monotherapy administration of approved drug into a different site (e.g., intraperitoneal)  Nuclear medicine or radio-labeled drugs  Drugs used for stem cell transplant  Intravenous vs subcutaneous or comparison of oral formulations of the same drug  Anti-emetics  Not published in English  Not a Phase I, Ia, or Ib interventional study  Not in humans  Preclinical studies  Pediatric studies  Non-interventional studies  Retrospective studies  Screening, diagnostic, prognostic, imaging, biomarker, economic studies  Case reports  Congress abstracts  Reviews or meta-analyses  Study protocols  Notes, commentaries, corrections, editorials, letters, opinions, book chapters |
